# Supplementary material for: Perceptions of cancer risk factors and socioeconomic status. A French study
Source: PubMed Central journal article supplement — Prev Med Rep. 2016 Feb 2;3:171–6. doi: 10.1016/j.pmedr.2016.01.008 (PMC4929177; doi:10.1016/j.pmedr.2016.01.008), 2016-02-02
Supplement: mmc1.pdf [file mmc1.pdf]

**ANNEX: SUPPLEMENTARY MATERIAL.**

**Table S1. Respondents' perceptions of cancer risk factors: results from principal component analysis (contributions to the 3 first axes) (France, 2010, n =3,359).**

|                                                         | Contributions after<br>varimax rotation <sup>a</sup> |             |             |
|---------------------------------------------------------|------------------------------------------------------|-------------|-------------|
|                                                         | Axis 1                                               | Axis 2      | Axis 3      |
| <b>Behavioral risk factors</b>                          |                                                      |             |             |
| Tobacco smoking                                         | 0.00                                                 | <b>0.22</b> | 0.02        |
| Alcohol drinking                                        | 0.00                                                 | <b>0.24</b> | 0.00        |
| Having sun exposure without protection                  | 0.00                                                 | <b>0.20</b> | 0.02        |
| Lack of physical activity                               | 0.04                                                 | <b>0.12</b> | 0.01        |
| Having tanning lamp sessions                            | 0.00                                                 | <b>0.15</b> | 0.06        |
| Cannabis smoking                                        | 0.00                                                 | <b>0.14</b> | 0.02        |
| <b>Environmental risk factors</b>                       |                                                      |             |             |
| Eating chemically-treated food                          | 0.01                                                 | 0.06        | <b>0.22</b> |
| Breathing a polluted air                                | 0.00                                                 | <b>0.11</b> | <b>0.18</b> |
| Living near a nuclear power plant                       | 0.00                                                 | 0.00        | <b>0.53</b> |
| Living near a mobile telephone relay station            | 0.01                                                 | 0.01        | <b>0.38</b> |
| <b>Psychosocial risk factors</b>                        |                                                      |             |             |
| Suffering from stress of the modern life                | <b>0.14</b>                                          | 0.03        | 0.02        |
| Being weakened by painful experiences                   | <b>0.17</b>                                          | 0.00        | 0.01        |
| Having difficulties in expressing feelings and emotions | <b>0.15</b>                                          | 0.00        | 0.00        |
| Bitterness due to personal/professional disappointments | <b>0.17</b>                                          | 0.00        | 0.01        |

<sup>a</sup> A varimax rotation was performed to maximize the sum of the variances of the squared loadings on each axe.
